# Supplementary material
Source: PubMed Central journal article supplement (PMC4325822)
Supplement: AAC.04347-14_zac003153762so1.pdf [file AAC.04347-14_zac003153762so1.pdf]

## Supplementary Tables and Figures

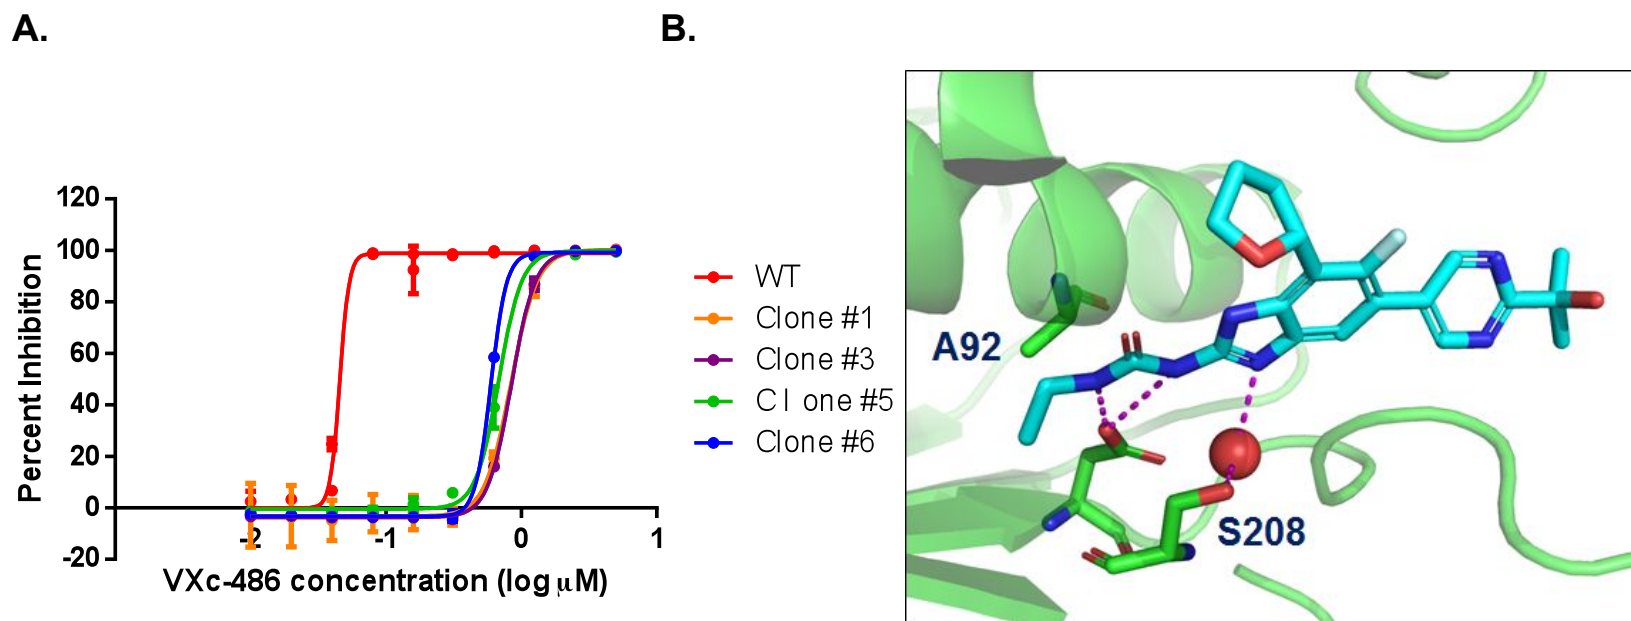

Figure S1. *Mtb* (H37Ra isolate) genetic variants generated after selection with VXc-486 at 2x and 4x minimal inhibitory concentration (MIC). A. Four *gyrB* variant clones were selected, three of which contained an A92S substitution (GCG – ICG) and one (clone 6) contained the S208A substitution, (TCA-GCA). The MIC potencies were evaluated in triplicate and the mean values with standard error are shown. B. A model of VXc-486 in complex with *Mtb* gyrase B illustrating the

location of the two sites of mutation relative to the bound inhibitor. Ser 208 is located in proximity of the urea of VXc-486. The S208A substitution alters the hydrogen bonding network in the complex and destabilizes the catalytic water (represented by the red sphere). The model was generated by docking of VXc-486 into the published crystal structure of Mtb gyrase B (PDB code: 3zkb) followed by energy minimization with rigid protein and flexible ligand. Docking was performed with ICM v. 3.7 (Molsoft, LLC, San Diego, CA, USA). Energy minimization was performed with Macromodel v. 10.0 (Schrodinger, Inc., New York, NY).

**TABLE S1.** Partial sequencing of drug resistant *Mycobacterium tuberculosis* clinical isolates revealed specific genetic mutations associated with drug resistance.

| Sample | rpoB1  | katG1  | tlyA  | embB   | rrs         | rrs500 | inhA-promoter | gyrA  | pncA1         |
|--------|--------|--------|-------|--------|-------------|--------|---------------|-------|---------------|
| TT135  | 531TTG | 315ACC | WT    | 306ATC | 1401G       | 513CAC | -15           | 90GTG | 14CGC         |
| TT149  | 516TAC | 315ACC | WT    | WT     | 1401G       | WT     | WT            | 94GCC | WT            |
| X_3    | 531TTG | 315ACC | 11CTG | 36ATC  | 141G        | WT     | -15           | 94GGC | 14CGC         |
| X_27   | 531TTG | WT     | 11CTG | 306GTC | 1400 region | WT     | -15           | 90GTG | Del8G         |
| X_60   | 531TTG | WT     | 11CTG | 36GTC  | 141G        | WT     | WT            | 94GGC | 13TAG         |
| X_61   | 531TTG | WT     | 11CTG | WT     | 141G        | WT     | -15           | 94GGC | 97GAT         |
| X_131  | 531TT  | 315ACC | 11CTG | 497CGG | 1400 region | WT     | WT            | 94GGC | 130GCG, 85CCG |

WT: wild type.

**Table S2.** Synergistic and additive interactions of anti-mycobacterial compounds tested in combination with VXc-486 in *Mycobacterium tuberculosis* (H37Ra) broth cultures or in cultures of a *M. tuberculosis*-infected human macrophage-like cell line (THP-1 cells).

| Compound     | MIC ( $\mu\text{g/ml}$ ) | FIC  | Mtb THP-1 Cells ( $\text{IC}_{50}$ ) | FIC  |
|--------------|--------------------------|------|--------------------------------------|------|
| Isoniazid    | 0.21                     | 0.75 | 0.01                                 | 0.75 |
| Rifampin     | 0.03                     | 0.63 | 0.01                                 | 2.00 |
| Ethambutol   | 2.40                     | 0.63 | 1.30                                 | 2.00 |
| Amikacin     | 0.94                     | 2.00 | 0.26                                 | 2.00 |
| Moxifloxacin | 0.16                     | 1.00 | 0.12                                 | 1.00 |
| Linezolid    | 0.53                     | 0.50 | 0.36                                 | 2.00 |
| Bedaquiline  | 0.05                     | 1.00 | 0.03                                 | 0.50 |
| PA-824       | 0.14                     | 2.00 | 0.05                                 | 1.00 |
| Clofazimine  | 0.73                     | 2.00 | 0.18                                 | 0.50 |

Minimal inhibitory concentrations (MICs) were determined at 90% inhibition by two-fold serial dilution of compounds after 11 days of bacterial culture. A reporter strain of Mtb expressing firefly luciferase was used to infect THP-1 cells and

measure bacterial growth a 50% inhibitory concentration at five days post-infection. VXc-486 had an MIC of 0.07  $\mu\text{g/ml}$  and an  $\text{IC}_{50}$  of 0.01 in Mtb-infected THP-1 cells. The fractional inhibitory concentration (FIC) was determined for combinations of two compounds as a synergistic interaction ( $< 0.5$ ), additive interaction (0.5-2.0) or antagonistic interaction ( $>2.0$ ).

**Table S3.** Minimal inhibitory concentrations (MIC,  $\mu\text{g/ml}$ ) of VXc-486, Clarithromycin (CLR), and moxifloxacin (MXF) against clinical isolates of *Mycobacterium abscessus*.

| <b>Organism</b>         | <b>VXc-486</b> | <b>CLR</b>   | <b>MXF</b>   |
|-------------------------|----------------|--------------|--------------|
| BB2                     | 1              | 0.25         | 8            |
| 6153                    | 1              | 0.5          | 4            |
| 6025                    | 0.5            | 0.5          | 8            |
| 6005                    | 1              | 0.125        | 8            |
| 5908                    | 0.5            | 0.5          | 4            |
| 6142                    | 8              | 0.25         | 8            |
| 5931                    | 0.03           | 0.25         | 0.06         |
| 5605                    | 2              | 0.125        | 8            |
| 5901                    | 0.5            | 0.015        | 1            |
| 5812                    | 1              | 0.25         | 4            |
| 5960                    | 4              | >8           | 0.5          |
| BB1                     | 4              | 0.125        | >8           |
| BB3                     | 0.5            | 0.03         | 0.5          |
| 5922                    | 2              | 0.5          | 2            |
| BB4                     | 1              | >8           | 4            |
| BB5                     | 1              | 1            | 8            |
| BB6                     | 1              | >8           | 2            |
| BB7                     | 2              | 0.25         | 2            |
| BB8                     | 1              | 0.06         | 4            |
| 6111                    | 2              | 0.5          | 8            |
| 6126                    | 1              | 0.25         | >8           |
| LT949                   | 2              | 0.125        | 4            |
| <b>MIC<sub>50</sub></b> | <b>1</b>       | <b>0.25</b>  | <b>4</b>     |
| <b>MIC<sub>90</sub></b> | <b>4</b>       | <b>&gt;8</b> | <b>&gt;8</b> |

**Table S4.** Minimal inhibitory concentrations (MIC, µg/ml) of VXc-486 and moxifloxacin (MXF) against *Mycobacterium kansasii*

| Isolate                 | VXc-486     | MXF         |
|-------------------------|-------------|-------------|
| 0008                    | 0.03        | 0.06        |
| 262                     | 0.03        | 0.06        |
| 2242                    | 0.06        | 0.06        |
| 4302                    | 0.03        | 0.125       |
| 5075                    | 0.06        | 0.125       |
| 5983                    | 2           | 2           |
| 1673                    | 0.06        | 0.06        |
| 1701                    | 0.06        | 0.06        |
| 5076                    | 0.06        | 0.125       |
| 2610                    | 0.06        | 0.06        |
| ATCC 35755              | 0.03        | 0.06        |
| 1295                    | 0.06        | 0.06        |
| 0009                    | 0.015       | 0.06        |
| ATCC 12478              | 0.015       | 0.03        |
| 0164                    | 0.06        | 0.06        |
| W5219                   | 0.25        | 0.5         |
| PIC                     | 0.06        | 0.06        |
| RSL                     | 0.03        | 2           |
| 379                     | 0.03        | 0.03        |
| 258                     | 0.03        | 0.06        |
| SHP                     | 0.03        | 0.03        |
| 399                     | 0.06        | 0.25        |
| <b>MIC<sub>50</sub></b> | <b>0.06</b> | <b>0.06</b> |
| <b>MIC<sub>90</sub></b> | <b>0.06</b> | <b>0.5</b>  |

**Table S5.** Minimal inhibitory concentrations (MIC,  $\mu\text{g/ml}$ ) of VXc-486 and clarithromycin (CLR) against *Mycobacterium avium* and *Nocardia* spp.

| Organism                    | VXc-486 | CLR          |
|-----------------------------|---------|--------------|
| <i>M. avium</i> 103         | 0.23    | 120          |
| <i>M. avium</i> Far         | 0.23    | $\leq 0.125$ |
| <i>M. avium</i> 3404.4      | 0.23    | $\leq 0.125$ |
| <i>Nocardia caviae</i> 2497 | 0.125   | 0.5, 0.5     |
| <i>N. asteroides</i> 2039   | 1       | $\leq 0.008$ |
| <i>N. nova</i> 10           | 1       | $\leq 0.008$ |



**Table S6.** Mean pharmacokinetic parameters in plasma from female BALB/c mice following single oral administration of pVXc-486 at nominal doses.

| pVXc-486<br>(mg/kg) | Analyte  | AUC <sub>(0-t)</sub><br>( $\mu\text{g}\cdot\text{hr}/\text{ml}$ ) | C <sub>max</sub><br>( $\mu\text{g}/\text{ml}$ ) | t <sub>1/2</sub> (hr) | AUC <sub>(0-inf)</sub><br>( $\mu\text{g}\cdot\text{hr}/\text{ml}$ ) |
|---------------------|----------|-------------------------------------------------------------------|-------------------------------------------------|-----------------------|---------------------------------------------------------------------|
| 3                   | VXc-486  | 0.508                                                             | 1.01                                            | 1.10                  | 0.517                                                               |
|                     | pVXc-486 | BQL                                                               | BQL                                             | BQL                   | BQL                                                                 |
| 10                  | VXc-486  | 4.16                                                              | 4.01                                            | 2.12                  | 4.18                                                                |
|                     | pVXc-486 | BQL                                                               | BQL                                             | BQL                   | BQL                                                                 |
| 30                  | VXc-486  | 20.8                                                              | 13.3                                            | 6.53                  | 20.8                                                                |
|                     | pVXc-486 | BQL                                                               | BQL                                             | BQL                   | BQL                                                                 |
| 100                 | VXc-486  | 72.4                                                              | 26.7                                            | 7.80                  | 72.5                                                                |

The pVXc-486 was rapidly converted to VXc-486 and pVXc-486 was below the limit of detection in each plasma sample (BQL).

**Table S7.** pVXc-486 improves the potency of a second-line regimen in a mouse model of tuberculosis.

| Regimen*   | Mean lung log <sub>10</sub> CFU count (± SD) after treatment for: |             |             |             | Proportion (%) of mice with positive lung cultures 3 months after treatment for: |                    |
|------------|-------------------------------------------------------------------|-------------|-------------|-------------|----------------------------------------------------------------------------------|--------------------|
|            | 2 months                                                          | 4 months    | 5 months    | 6 months    | 5 months                                                                         | 7 months           |
| 2MEZA/5ME  | 3.68 ± 0.29                                                       | 1.79 ± 0.22 | 1.51 ± 0.36 | 0.59 ± 0.31 | 15 of 15<br>(100%)                                                               | 14 of 15<br>(93%)  |
| 2MPZA/5MP  | 2.33 ± 0.35                                                       | 1.06 ± 0.21 | 1.35 ± 0.33 | 0.31 ± 0.20 | 15 of 15<br>(100%)                                                               | 15 of 15<br>(100%) |
| 2MEZP/5MEP | 2.81 ± 0.15                                                       | 1.48 ± 0.27 | 1.59 ± 0.91 | 0.92 ± 0.22 | 15 of 15<br>(100%)                                                               | 15 of 15<br>(100%) |

\**Definition of abbreviations:* M, moxifloxacin; E, ethambutol; Z, pyrazinamide; A, amikacin; P, VXc-486 prodrug. Drugs were administered orally, 5 days per week, at the following doses: M 100 mg/kg; E 100 mg/kg; Z 150 mg/kg; P 100 mg/kg.

A was administered subcutaneously at 30 mg/kg. Z and A were administered for the first 2 months only. The early control mean lung log<sub>10</sub> CFU count was  $4.68 \pm 0.12$ , while the late control was  $7.90 \pm 0.17$ .
